# Supplementary material for: Procedural Outcomes of a Self-Expanding Transcatheter Heart Valve in Patients with Porcelain Aorta
Source: MDPI journal article supplement (doi:10.3390/jcm12030945), 2023-01-26
Supplement: s1 [file s1]

**Table S1. Baseline characteristics (matched population for classic PA).**

| Variable                             | Non PA<br>n=178  | Circular PA<br>n=89 | p Value |
|--------------------------------------|------------------|---------------------|---------|
| <b>Demographic and clinical data</b> |                  |                     |         |
| Age, years                           | 82.2 [79.0;85.2] | 82.0 [79.0;85.8]    | 0.952   |
| Female gender                        | 125 (70.2%)      | 53 (59.6%)          | 0.108   |
| BMI, kg/m <sup>2</sup>               | 26.8 [24.1;29.6] | 25.8 [23.7;30.1]    | 0.600   |
| EuroSCORE II, %                      | 3.5 [2.3;5.2]    | 3.7 [2.3;5.2]       | 0.938   |
| eGFR, ml/min/1.73 m <sup>2</sup>     | 51.0 [34.2;71.0] | 55.0 [43.0;73.0]    | 0.212   |
| Peripheral artery disease            | 22 (12.4%)       | 12 (13.5%)          | 0.948   |
| Prior stroke                         | 27 (15.2%)       | 12 (13.5%)          | 0.854   |
| Atrial fibrillation                  | 76 (42.7%)       | 35 (39.3%)          | 0.693   |
| Coronary artery disease              | 118 (66.3%)      | 58 (65.2%)          | 0.964   |
| Prior coronary intervention          | 89 (50.0%)       | 34 (38.2%)          | 0.090   |
| <b>Echocardiographic data</b>        |                  |                     |         |
| LV Ejection fraction, %              | 60.5 [52.0;65.0] | 60.0 [52.0;65.0]    | 0.636   |
| Mean gradient, mmHg                  | 41.0 [31.2;49.8] | 41.5 [34.8;50.0]    | 0.814   |
| AVA, cm <sup>2</sup>                 | 0.7 [0.6;0.9]    | 0.7 [0.6;0.8]       | 0.693   |
| <b>Electrocardiographic data</b>     |                  |                     |         |
| Right bundle branch block            | 27 (15.2%)       | 13 (14.6%)          | 1.000   |
| Left bundle branch block             | 13 (7.3%)        | 8 (9.0%)            | 0.809   |
| Atrioventricular block               | 27 (15.2%)       | 13 (14.6%)          | 1.000   |
| <b>MDCT data</b>                     |                  |                     |         |
| Annular area, cm <sup>2</sup>        | 3.6 [3.5;4.4]    | 3.7 [3.5;4.5]       | 0.404   |
| Annulus diameter, mm                 | 23.9 [22.9;25.3] | 23.9 [22.5;25.2]    | 0.487   |
| LVOT, mm                             | 23.2 [21.6;25.0] | 23.5 [21.6;24.8]    | 0.880   |
| STJ, mm                              | 27.7 [25.9;29.8] | 28.0 [26.5;29.9]    | 0.551   |
| Aortic valve calcification, AU       | 2171 [1567;3117] | 2488 [1585;3464]    | 0.429   |
| Calcium density, AU/cm <sup>2</sup>  | 558 [416;815]    | 644 [395;918]       | 0.494   |
| Calcification in LVOT                | 14 (7.9%)        | 9 (10.1%)           | 0.700   |
| Eccentric calcification              | 20 (11.2%)       | 10 (11.2%)          | 1.000   |

Abbreviations: PA = porcelain aorta, BMI = body mass index; eGFR = estimated glomerular filtration rate; LV = Left ventricle; AVA = aortic valve area; LVOT = left ventricular outflow tract; STJ = sinotubular junction. .

**Table S2: Procedural outcomes and complications (matched population for classic PA)**

| Variable                                               | Non PA (2:1)<br>n=178 | Circular PA<br>n=89  | p Value |
|--------------------------------------------------------|-----------------------|----------------------|---------|
| <b>Procedural parameter</b>                            |                       |                      |         |
| Procedural duration, min                               | 45.00 [37.25;57.00]   | 47.00 [37.00;65.25]  | 0.623   |
| Contrast agent, ml                                     | 93.50 [70.00;118.75]  | 90.00 [55.00;120.00] | 0.607   |
| Pre-dilatation, %                                      | 144 (80.90%)          | 72 (80.90%)          | 1.000   |
| Post-dilatation, %                                     | 60 (34.68%)           | 28 (31.46%)          | 0.700   |
| Protection device, %                                   | 4 (2.25%)             | 1 (1.12%)            | 0.668   |
| Depth NCC, mm                                          | 5.95 [4.00;7.00]      | 6.00 [4.00;7.00]     | 0.237   |
| Depth LCC, mm                                          | 6.00 [4.30;7.00]      | 6.00 [5.00;7.00]     | 0.269   |
| Cover Index (annulus)                                  | 5.19 [3.21;7.20]      | 5.43 [3.28;7.23]     | 0.910   |
| <b>Echocardiographic outcome</b>                       |                       |                      |         |
| LV Ejection fraction, %                                | 65.00 [56.00;65.00]   | 63.00 [53.00;65.00]  | 0.491   |
| Mean gradient, mmHg                                    | 8.00 [6.00;10.50]     | 8.00 [6.00;11.00]    | 0.788   |
| AVA, cm <sup>2</sup>                                   | 1.70 [1.50;2.00]      | 1.72 [1.45;1.90]     | 0.658   |
| iAVA, cm <sup>2</sup> /m <sup>2</sup>                  | 0.96 [0.81;1.10]      | 0.94 [0.85;1.05]     | 0.703   |
| <b>Procedural and clinical outcome</b>                 |                       |                      |         |
| Technical success                                      | 159 (89.33%)          | 76 (85.39%)          | 0.464   |
| Device success at 30 days                              | 148 (83.15%)          | 72 (80.90%)          | 0.776   |
| Early safety at 30 days                                | 93 (52.25%)           | 43 (48.31%)          | 0.634   |
| Inhospital death                                       | 2 (1.12%)             | 0 (0.00%)            | 0.554   |
| Periprocedural death<br>(inhospital and up to 30 days) | 4 (2.25%)             | 2 (2.25%)            | 1.000   |
| Relevant PVL (> mild/trace)                            | 9 (5.06%)             | 4 (4.49%)            | 1.000   |
| More than mild PPM                                     | 6 (4.29%)             | 4 (6.06%)            | 0.729   |
| Conversion to sternotomy                               | 1 (0.56%)             | 0 (0.00%)            | 1.000   |
| Multiple valves (ViV)                                  | 5 (2.81%)             | 1 (1.12%)            | 0.667   |
| Device embolization                                    | 6 (3.37%)             | 1 (1.12%)            | 0.430   |
| Major vascular complication                            | 14 (7.87%)            | 12 (13.48%)          | 0.215   |
| Bleeding (type 2-4)                                    | 38 (21.35%)           | 22 (24.72%)          | 0.641   |
| Major cardiac structural complication                  | 1 (0.56%)             | 0 (0.00%)            | 1.000   |
| All stroke                                             | 5 (2.81%)             | 4 (4.49%)            | 0.487   |
| Neurologic dysfunction without CNS injury<br>(TIA)     | 3 (1.69%)             | 0 (0.00%)            | 0.553   |
| AKI (type 2-4)                                         | 9 (5.06%)             | 3 (3.37%)            | 0.756   |
| New permanent pacemaker <sup>1</sup>                   | 18 (11.18%)           | 12 (15.19%)          | 0.385   |

Abbreviations: PA = porcelain aorta; THV = transcatheter heart valve; LCC = left coronary cusp; NCC = non coronary cusp; AVA = aortic valve area; iAVA = indexed aortic valve area; PVL = paravalvular leak; CNS = central nervous system; ppm = prosthesis-patient mismatch; AKI = acute kidney injury.

<sup>1</sup>Excluded patients with pacemaker at baseline (n=27).

**Table S3: Procedural outcomes and complications (entire population)**

| Variable                                               | Non PA<br>n=2518  | Partial PA<br>n=403 | Circular PA<br>n=89 | p Value |
|--------------------------------------------------------|-------------------|---------------------|---------------------|---------|
| <b>Procedural parameter</b>                            |                   |                     |                     |         |
| Procedural duration, min                               | 45 [37;59]        | 50 [40;66]          | 47 [37;65]          | <0.001  |
| Contrast agent, ml                                     | 90 [60;115]       | 95 [70;120]         | 90 [55;120]         | 0.008   |
| Pre-dilatation, %                                      | 1967 (78.12%)     | 344 (85.36%)        | 72 (80.90%)         | 0.004   |
| Post-dilatation, %                                     | 821 (32.89%)      | 130 (32.42%)        | 28 (31.46%)         | 0.947   |
| Protection device, %                                   | 63 (2.50%)        | 9 (2.23%)           | 1 (1.12%)           | 0.857   |
| Depth NCC, mm                                          | 6.00 [4.00;6.50]  | 6.00 [4.00;7.00]    | 6.00 [4.00;7.00]    | 0.030   |
| Depth LCC, mm                                          | 6.00 [4.00;7.00]  | 6.00 [4.80;7.00]    | 6.00 [5.00;7.00]    | <0.001  |
| Cover Index (annulus)                                  | 4.84 [2.83;7.01]  | 4.46 [2.39;6.37]    | 5.43 [3.28;7.23]    | 0.014   |
| <b>Echocardiographic outcome</b>                       |                   |                     |                     |         |
| LV Ejection fraction, %                                | 65 [56;65]        | 63 [55;65]          | 63 [53;65]          | 0.052   |
| Mean gradient, mmHg                                    | 8.00 [6.00;11.00] | 8.00 [6.00;11.00]   | 8.00 [6.00;11.00]   | 0.166   |
| AVA, cm <sup>2</sup>                                   | 1.70 [1.50;2.00]  | 1.80 [1.52;2.10]    | 1.72 [1.45;1.90]    | 0.045   |
| iAVA, cm <sup>2</sup> /m <sup>2</sup>                  | 0.93 [0.80;1.07]  | 0.94 [0.83;1.14]    | 0.94 [0.85;1.05]    | 0.119   |
| <b>Procedural and clinical outcome</b>                 |                   |                     |                     |         |
| Technical success                                      | 2280 (90.55%)     | 354 (87.84%)        | 76 (85.39%)         | 0.081   |
| Device success at 30 days                              | 2131 (84.63%)     | 329 (81.64%)        | 72 (80.90%)         | 0.219   |
| Early safety at 30 days                                | 1057 (41.98%)     | 199 (49.38%)        | 43 (48.31%)         | 0.013   |
| Inhospital death                                       | 52 (2.07%)        | 11 (2.73%)          | 0 (0.00%)           | 0.286   |
| Periprocedural death<br>(inhospital and up to 30 days) | 70 (2.78%)        | 14 (3.47%)          | 2 (2.25%)           | 0.694   |
| Relevant PVL (> mild/trace)                            | 95 (3.78%)        | 16 (3.97%)          | 4 (4.49%)           | 0.820   |
| More than mild PPM                                     | 74 (3.73%)        | 13 (4.64%)          | 4 (6.06%)           | 0.366   |
| Conversion to sternotomy                               | 25 (0.99%)        | 2 (0.50%)           | 0 (0.00%)           | 0.651   |
| Multiple valves (ViV)                                  | 28 (1.11%)        | 4 (0.99%)           | 1 (1.12%)           | 1.000   |
| Device migration / embolization                        | 36 (1.43%)        | 7 (1.74%)           | 1 (1.12%)           | 0.876   |
| Major vascular complication                            | 200 (7.95%)       | 33 (8.19%)          | 12 (13.48%)         | 0.172   |
| Bleeding (type 2-4)                                    | 443 (17.60%)      | 95 (23.57%)         | 22 (24.72%)         | 0.005   |
| Major cardiac structural<br>complication               | 43 (1.71%)        | 4 (0.99%)           | 0 (0.00%)           | 0.391   |
| All stroke                                             | 79 (3.14%)        | 9 (2.23%)           | 4 (4.49%)           | 0.425   |
| Neurologic dysfunction without<br>CNS injury (TIA)     | 15 (0.60%)        | 6 (1.49%)           | 0 (0.00%)           | 0.140   |
| AKI (type 2-4)                                         | 109 (4.33%)       | 12 (2.98%)          | 3 (3.37%)           | 0.482   |
| New permanent pacemaker <sup>1</sup>                   | 220 (9.84%)       | 40 (11.30%)         | 12 (15.19%)         | 0.247   |

Abbreviation: PA = porcelain aorta; THV = transcatheter heart valve; LCC = left coronary cusp; NCC = non coronary cusp; AVA = aortic valve area; iAVA = indexed aortic valve area; PVL = paravalvular leak; CNS = central nervous system; ppm = prosthesis-patient mismatch; AKI = acute kidney injury.

<sup>1</sup>Excluded patients with pacemaker at baseline (n=342).

**Table S4: Matching Algorithm**

| Variables used for propensity matching |                                       |                            |
|----------------------------------------|---------------------------------------|----------------------------|
| Clinical / ECG                         | CHA <sub>2</sub> DS <sub>2</sub> VASc | MDCT                       |
| EuroSCORE II                           | Atrial fibrillation                   | Cusp calcification (AU)    |
| Previous PCI                           | Age                                   | LVOT calcification         |
| Diabetes                               | Gender                                | Eccentric AV calcification |
| COPD                                   | Previous CAD                          |                            |
| Left branch bundle block               | Previous stroke                       |                            |
| Right branch bundle block              | PAD                                   |                            |
| Creatinin clearance (eGFR)             | aHT                                   |                            |

Abbreviations: AV = aortic valve; COPD = chronic obstructive pulmonary disease; CAD = coronary artery disease, MDCT = multidetector computed tomography; PCI = percutaneous coronary intervention, PAD = peripheral arterial disease, aHT = arterial hypertension.

**Table S5: Technical Failure**

| Variable                              | Non PA (2:1)<br>n=984 | PA<br>n=492 | p Value |
|---------------------------------------|-----------------------|-------------|---------|
| <b>Technical failure</b>              | 113 (11.5%)           | 62 (12.6%)  | 0.589   |
| Death on table, %                     | 3 (0.3%)              | 2 (0.4%)    | 1.000   |
| Moderate paravalvular leakage, %      | 28 (2.9%)             | 18 (3.7%)   | 0.504   |
| Major vascular complication           | 70 (7.1%)             | 45 (9.1%)   | 0.204   |
| Major cardiac structural complication | 14 (1.4%)             | 4 (0.8%)    | 0.450   |

Abbreviation: PA = porcelain aorta.
